# Supplementary material for: Ecology, evolution, and conservation of Ethiopia’s biodiversity
Source: PubMed Central journal article supplement — Proc Natl Acad Sci U S A. 2022 Dec 9;119(50):e2206635119. doi: 10.1073/pnas.2206635119 (PMC9897469; doi:10.1073/pnas.2206635119), 2022-12-09
Supplement: pnas.2206635119.sapp.pdf [file pnas.2206635119.sapp.pdf]

**Table S1.** Key for protected area names and types for the map in Figure 1. Source: UNEP-WCMC and IUCN (2022), Protected Planet: The World Database on Protected Areas (WDPA) [Online], August 2022, Cambridge, UK: UNEP-WCMC and IUCN. Available at: [www.protectedplanet.net](http://www.protectedplanet.net). The two community conservation areas relevant to the paper were added manually to the list and the map.

| <b>Map ID</b> | <b>Area Name</b>           | <b>Area Type</b>             |
|---------------|----------------------------|------------------------------|
| 0             | Kafta-Shiraro              | National Park                |
| 1             | Kafa                       | UNESCO-MAB Biosphere Reserve |
| 2             | Arsi Mountains             | National Park                |
| 3             | Borena                     | National Park                |
| 4             | Maze                       | National Park                |
| 5             | Beroye                     | Controlled Hunting Area      |
| 6             | Bilen-Hertale              | Controlled Hunting Area      |
| 7             | Dhati-Welel                | National Park                |
| 8             | Tullu Lafto-Sadden         | Sanctuary                    |
| 9             | Abasheba Demero            | Controlled Hunting Area      |
| 10            | Asbari-Dullessa            | Controlled Hunting Area      |
| 11            | Chifra                     | Controlled Hunting Area      |
| 12            | Dindin                     | Controlled Hunting Area      |
| 13            | Shinile-Meto               | Controlled Hunting Area      |
| 14            | Sororo-Torgam-Gara- Muktar | Controlled Hunting Area      |
| 15            | Urgan-Bula                 | Controlled Hunting Area      |
| 16            | Naniga Dhera               | Controlled Hunting Area      |
| 17            | Besmena-Odobulu            | Controlled Hunting Area      |
| 18            | Gassera Wabe               | Controlled Hunting Area      |
| 19            | Hurufa Soma                | Controlled Hunting Area      |
| 20            | Jibat                      | Controlled Hunting Area      |
| 21            | Munessa Ambagoda-Sade      | Controlled Hunting Area      |
| 22            | Denbel-Ayisha-Adigala      | Controlled Hunting Area      |
| 23            | Liben Plain                | Sanctuary                    |
| 24            | Malka Guba                 | National Park                |
| 25            | Gara-Meti                  | Open Hunting Area            |
| 26            | Munessa Kuke               | Controlled Hunting Area      |
| 27            | Gara-Gumbi                 | Open Hunting Area            |
| 28            | Hanto                      | Controlled Hunting Area      |
| 29            | Haro-Aba-Dikko             | Controlled Hunting Area      |
| 30            | Telalak Dewe               | Controlled Hunting Area      |
| 31            | Welishet Sala              | Controlled Hunting Area      |
| 32            | Weyib Valley               | Controlled Hunting Area      |

|    |                    |                                                              |
|----|--------------------|--------------------------------------------------------------|
| 33 | Hadar              | Controlled Hunting Area                                      |
| 34 | Amibera-Melikasad  | Controlled Hunting Area                                      |
| 35 | Aluto              | Controlled Hunting Area                                      |
| 36 | Adaba-Dodola       | Controlled Hunting Area                                      |
| 37 | Gelila-Duru        | Open Hunting Area                                            |
| 38 | Bejimiz            | National Park                                                |
| 39 | Deddessa           | National Park                                                |
| 40 | Geralle            | National Park                                                |
| 41 | Gibe Sheleko       | National Park                                                |
| 42 | Loka-Abaya         | National Park                                                |
| 43 | Mao-Komo           | National Park                                                |
| 44 | Yayu               | UNESCO-MAB Biosphere Reserve / National Forest Priority Area |
| 45 | Abelti Gibie       | National Forest Priority Area                                |
| 46 | Belete Gera        | National Forest Priority Area                                |
| 47 | Babiya-Fola        | National Forest Priority Area                                |
| 48 | Tiro-Boter-Becho   | National Forest Priority Area                                |
| 49 | Godere             | National Forest Priority Area                                |
| 50 | Sele Anderacha     | National Forest Priority Area                                |
| 51 | Sibu-Tole-Kobo     | National Forest Priority Area                                |
| 52 | Bonga              | National Forest Priority Area                                |
| 53 | Gura Ferda         | National Forest Priority Area                                |
| 54 | Yeki               | National Forest Priority Area                                |
| 55 | Jibat              | National Forest Priority Area                                |
| 56 | Chilimo-Gaji       | National Forest Priority Area                                |
| 57 | Wof-Washa          | National Forest Priority Area                                |
| 58 | Dire-Gerbicha      | National Forest Priority Area                                |
| 59 | Butajira           | National Forest Priority Area                                |
| 60 | Menagesha-Suba     | National Forest Priority Area                                |
| 61 | Anferara-Wadera    | National Forest Priority Area                                |
| 62 | Bore-Anferara      | National Forest Priority Area                                |
| 63 | Megada             | National Forest Priority Area                                |
| 64 | Negele (Mankubssa) | National Forest Priority Area                                |
| 65 | Arero              | National Forest Priority Area                                |
| 66 | Gergeda            | National Forest Priority Area                                |
| 67 | Jorgo-Wato         | National Forest Priority Area                                |
| 68 | Konchi             | National Forest Priority Area                                |
| 69 | Chato-Sengi-Dengeb | National Forest Priority Area                                |
| 70 | Komto-Waga-Tsige   | National Forest Priority Area                                |

|     |                              |                                                      |
|-----|------------------------------|------------------------------------------------------|
| 71  | Dodola-Adaba-Lajo            | National Forest Priority Area                        |
| 72  | Aloshie-Batu                 | National Forest Priority Area                        |
| 73  | Goro-Bele                    | National Forest Priority Area                        |
| 74  | Harena-Kokosa                | National Forest Priority Area                        |
| 75  | Mena-Angetu                  | National Forest Priority Area                        |
| 76  | Kubayo                       | National Forest Priority Area                        |
| 77  | Yegof-Erike                  | National Forest Priority Area                        |
| 78  | Gedo                         | National Forest Priority Area                        |
| 79  | Desa-A                       | National Forest Priority Area                        |
| 80  | Gumburda-Grakaso             | National Forest Priority Area                        |
| 81  | Yerer                        | National Forest Priority Area                        |
| 82  | Shako                        | National Forest Priority Area                        |
| 83  | Abey-Albasa                  | National Forest Priority Area                        |
| 84  | Arba-Minch                   | National Forest Priority Area                        |
| 85  | Yabelo                       | National Forest Priority Area                        |
| 86  | Munesa-Shashemene            | National Forest Priority Area                        |
| 87  | Chebera Churchura            | National Park                                        |
| 88  | Alitash                      | National Park                                        |
| 89  | Donkoro Chaka                | National Park                                        |
| 90  | Awash                        | National Park                                        |
| 91  | Simien Mountains             | National Park/UNESCO World Heritage Site             |
| 92  | Guassa                       | Community Conservation Area                          |
| 93  | Yangudi Rassa                | National Park                                        |
| 94  | Mago                         | National Park                                        |
| 95  | Nech-sar                     | National Park                                        |
| 96  | Abijatta-Shalla              | National Park                                        |
| 97  | Omo                          | National Park                                        |
| 98  | Bale Mountains               | National Park/(tentative) UNESCO World Heritage Site |
| 99  | Gewane                       | Wildlife Reserve                                     |
| 100 | Mille-Serdo                  | Wildlife Reserve                                     |
| 101 | Awash-West                   | Wildlife Reserve                                     |
| 102 | Chelbi                       | Wildlife Reserve                                     |
| 103 | Yabello                      | Sanctuary                                            |
| 104 | Tama                         | Wildlife Reserve                                     |
| 105 | Senkelle Swayne's Hartebeest | Sanctuary                                            |
| 106 | Halledeghe Asobot            | Wildlife Reserve                                     |
| 107 | Gambella                     | National Park                                        |

|     |                     |                               |
|-----|---------------------|-------------------------------|
| 108 | Dabus Valley        | Controlled Hunting Area       |
| 109 | Tedo                | Controlled Hunting Area       |
| 110 | Omo West            | Controlled Hunting Area       |
| 111 | Murule              | Controlled Hunting Area       |
| 112 | Arba Gugu           | Controlled Hunting Area       |
| 113 | Eastern Hararghe    | Controlled Hunting Area       |
| 114 | Awash West          | Controlled Hunting Area       |
| 115 | Afdem-Gewane        | Controlled Hunting Area       |
| 116 | Erer-Gota           | Controlled Hunting Area       |
| 117 | Boyo Swamp          | Controlled Hunting Area       |
| 118 | Segen Valley        | Controlled Hunting Area       |
| 119 | Babile Elephant     | Sanctuary                     |
| 120 | Akobo               | Controlled Hunting Area       |
| 121 | Mizan-Teferi        | Controlled Hunting Area       |
| 122 | Chilalo-Gallema     | National Forest Priority Area |
| 123 | Deme-Laha           | National Forest Priority Area |
| 124 | Bulki-Melakoza      | National Forest Priority Area |
| 125 | Gidole-Kemba        | National Forest Priority Area |
| 126 | Kahatasa-Guangua    | National Forest Priority Area |
| 127 | Sekela Mariam       | National Forest Priority Area |
| 128 | Dengego-Melka Jedbu | National Forest Priority Area |
| 129 | Gara Muleta         | National Forest Priority Area |
| 130 | Jarso-Gursum        | National Forest Priority Area |
| 131 | Dindin-Arbagugu     | National Forest Priority Area |
| 132 | Jalo-Addes          | National Forest Priority Area |
| 133 | Abobo-Gog           | National Forest Priority Area |
| 134 | Gebre Dima          | National Forest Priority Area |
| 135 | Sigmo-Geba          | National Forest Priority Area |
| 136 | Abune Yosef         | Community Conservation Area   |

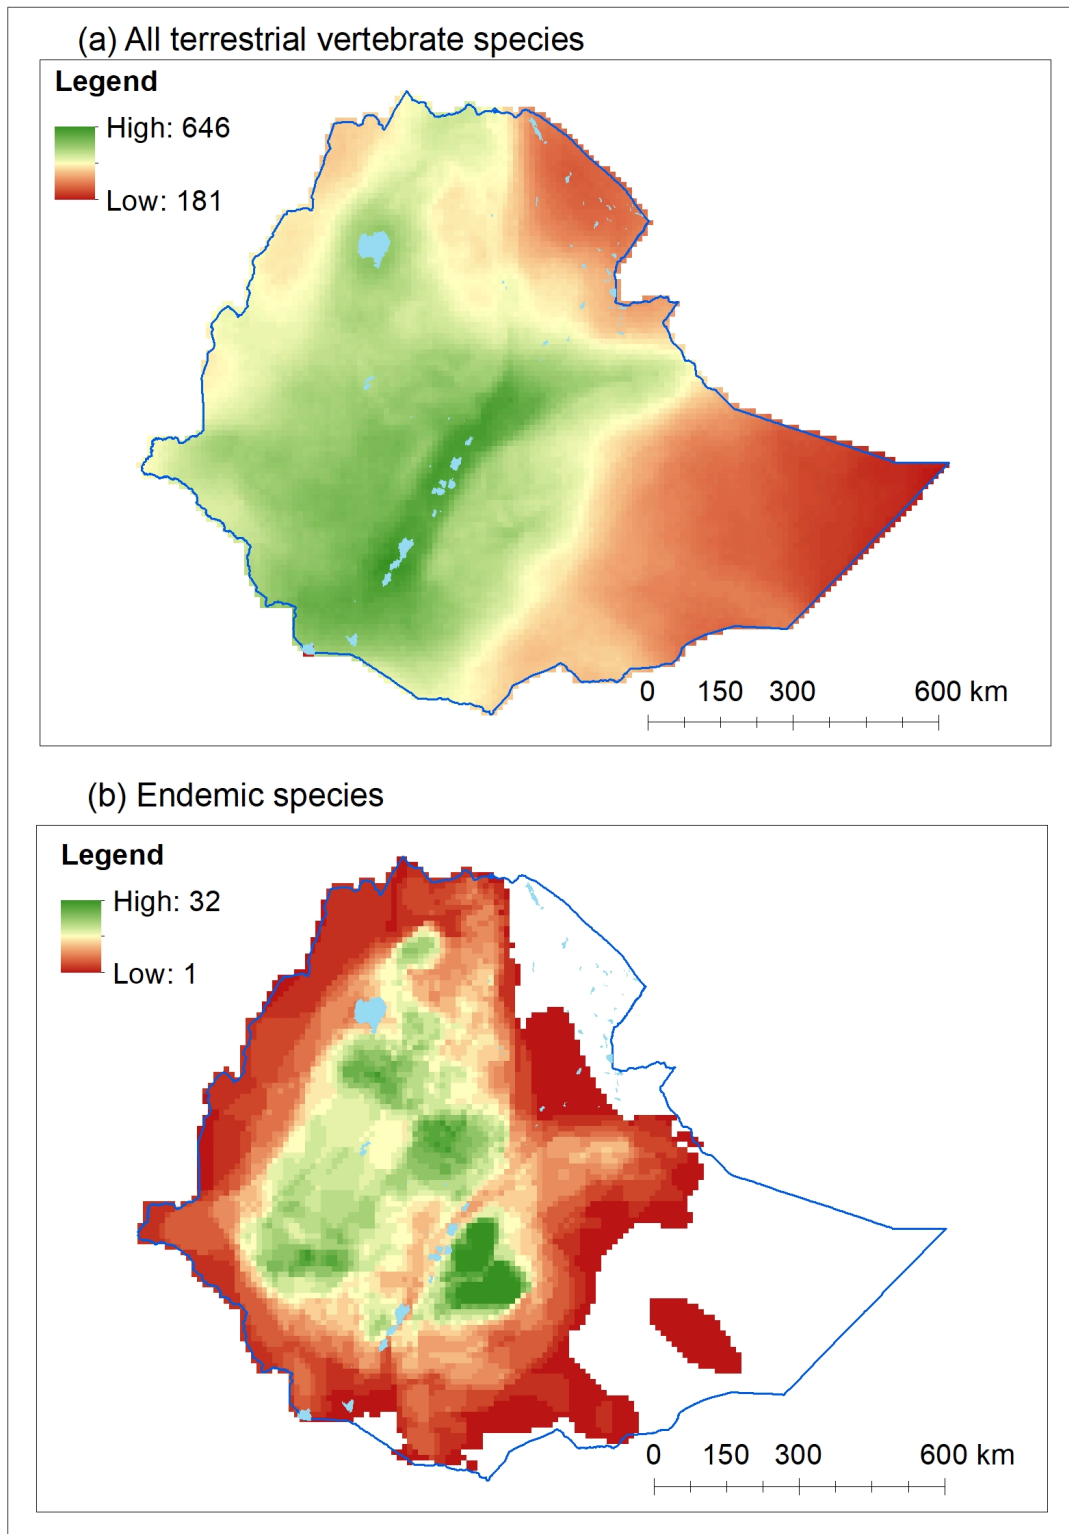

**Fig. S1.** Map of Ethiopia highlighting the distribution of (A) terrestrial vertebrates and (B) endemic terrestrial vertebrates across the country along gradients of high to low species richness. Modified with permission from (22)

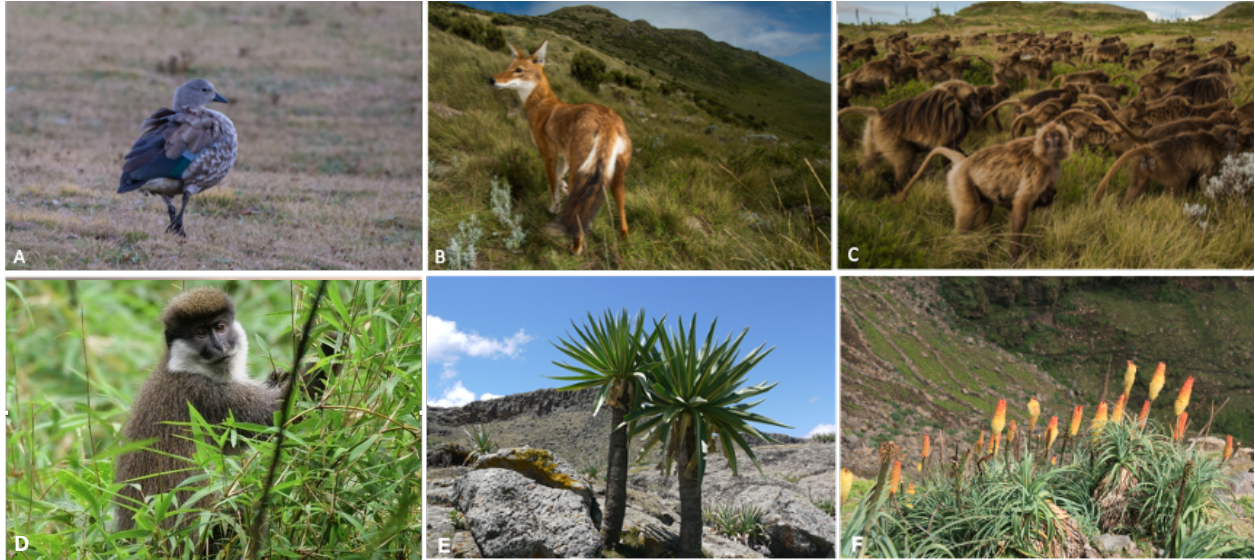

**Fig. S2.** Six flagship fauna and flora endemic to the Ethiopian Highlands. (A) The blue-winged goose (Aves: Anatidae: *Cyanochen cyanoptera*) inhabits rivers, lakes, and Afroalpine grasslands, (B) the Ethiopian wolf (Mammalia; Canidae: *Canis simensis*) is the world's rarest canid and subsists mostly on rodents, (C) Geladas (Mammalia: Cercopithecidae: *Theropithecus gelada*) form complex multi-tiered societies and eat mostly graminoids, (D) Bale monkeys (Mammalia: Cercopithecidae: *Chlorocebus djamdjamensis*) favour a diet of primarily montane bamboo, (E) Giant lobelias (Eudicots: Campanulaceae: *Lobelia rhynchopetalum*) are among the tallest plants on the Afroalpine grasslands where they occur, and (F) Torch lilies (Eudicots: Asphodelaceae: *Kniphofia foliosa*) are a perennial flowering herb native to Afroalpine grasslands. Photo (A) by Vivek V. Venkataraman, Photo (B) by Jeffrey T. Kerby and Trevor Frost, Photo (C) by Jeffrey T. Kerby, Photo (D) by Addisu Mekonnen, Photo (E) by Abel Gizaw, and Photo (F) by Sebsebe Demissew.

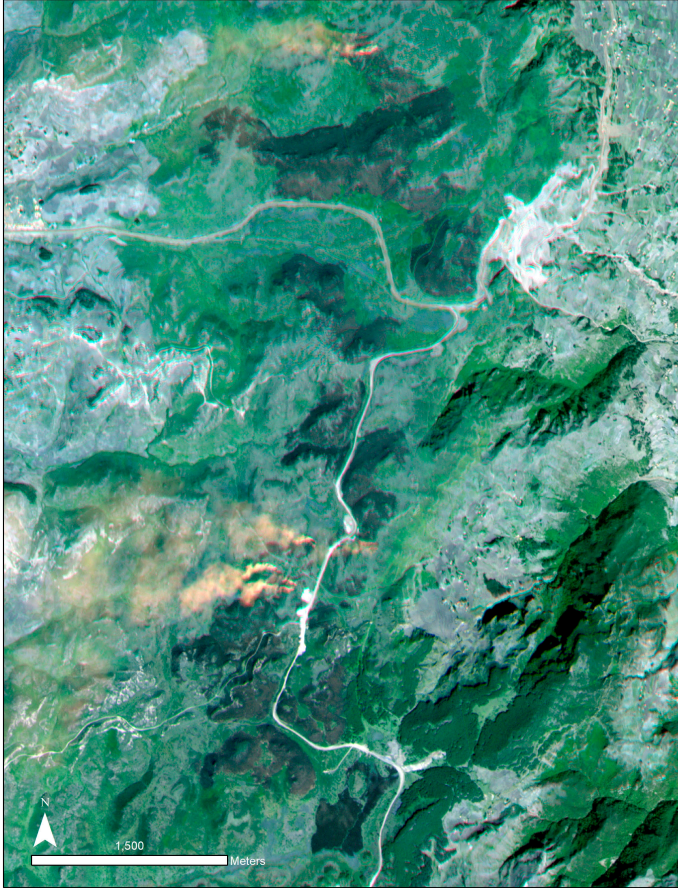

**Fig. S3.** Fires covering ~500 ha in Guassa Community Conservation Area ignited during a November 2021 battle from Ethiopia's ongoing civil war. In addition to the immediate threats stemming from the war, Ethiopian biodiversity faces long-term challenges resulting from rapid human population growth, land use change, and climate change.

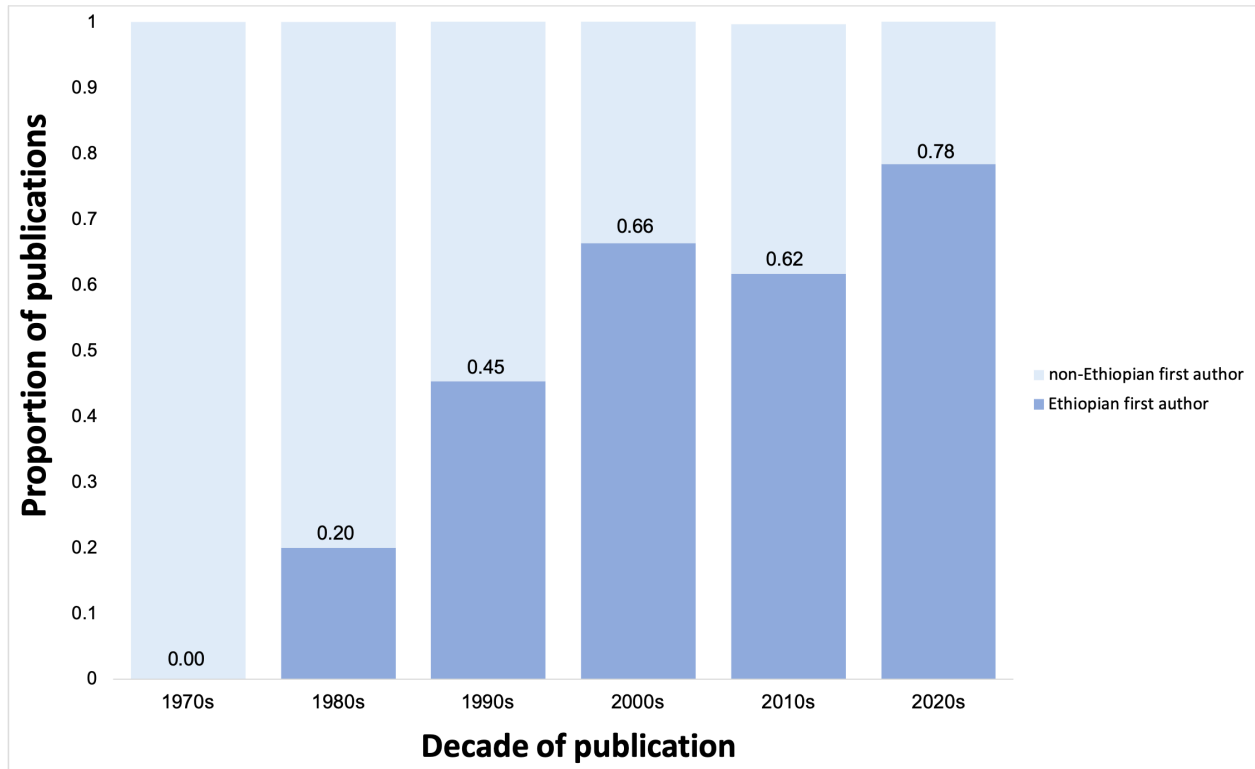

**Fig. S4.** Proportion of peer-reviewed journal articles (Web of Science search, September 15, 2022) on extant Ethiopian biodiversity (n=745) first-authored by Ethiopian vs. non-Ethiopian scientists by decade between the 1970s and 2020s. Title or author keywords search terms: “Ethiopia\* AND ecology OR mammal\* OR bird\* OR plant\* OR insect\* OR reptile\* OR fish\* OR forest\* OR invertebrate\* OR new species OR amphibian\* OR biodiversity”. Articles concerning extinct Ethiopian species and solely on crop plants or domestic animals were excluded from the analysis. Data from which this graph was generated are available in the accompanying data file “Data for Figure S4.xlsx”.
